# Supplementary material for: Transcriptome Analysis and HPLC Profiling of Flavonoid Biosynthesis in Citrus aurantium L. during Its Key Developmental Stages
Source: MDPI journal article supplement (doi:10.3390/biology11071078), 2022-07-19
Supplement: s1 [file s1]

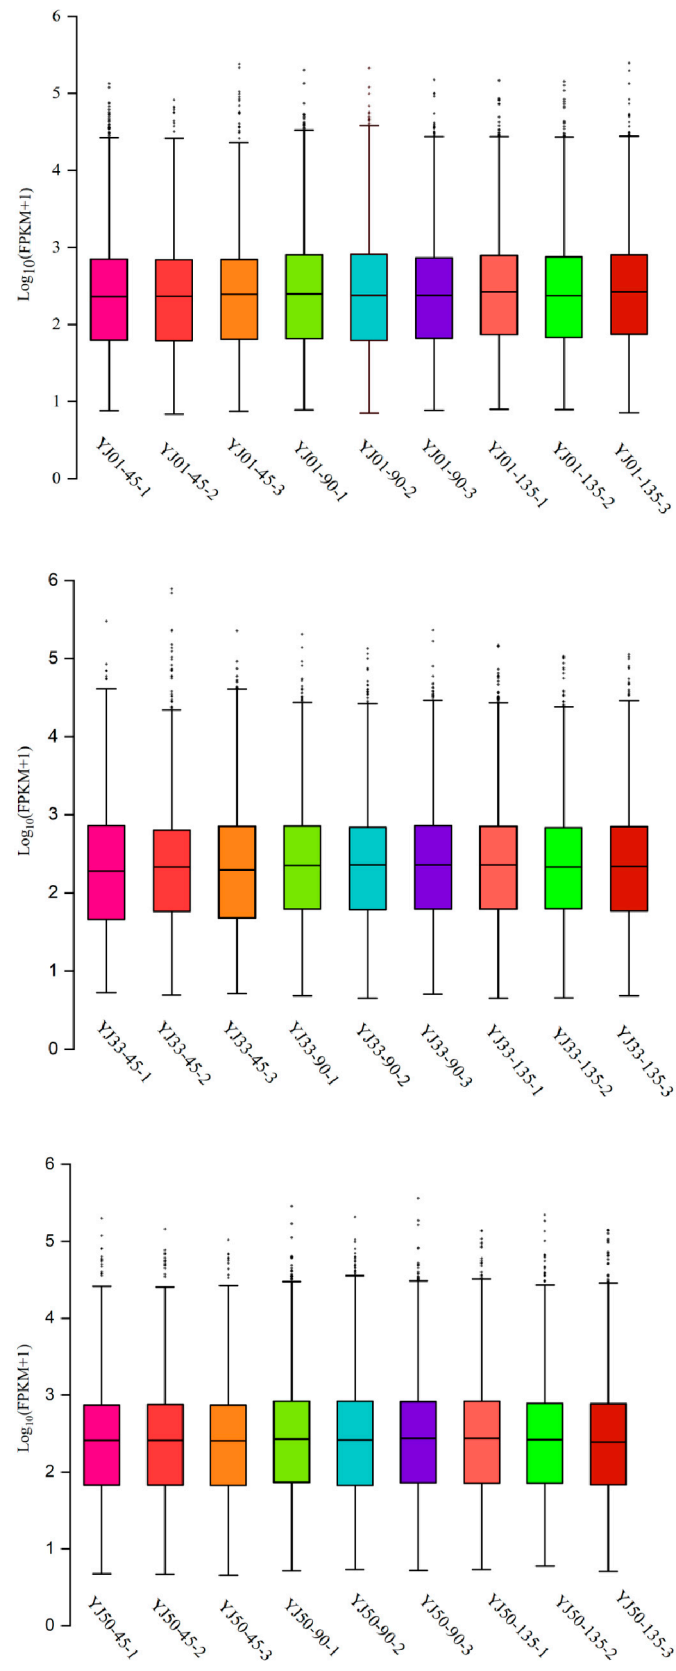

Figure S1. Boxplot for FPKM values. 45/90/135 means the days after full blooming. 1/2/3 represent three replicates.

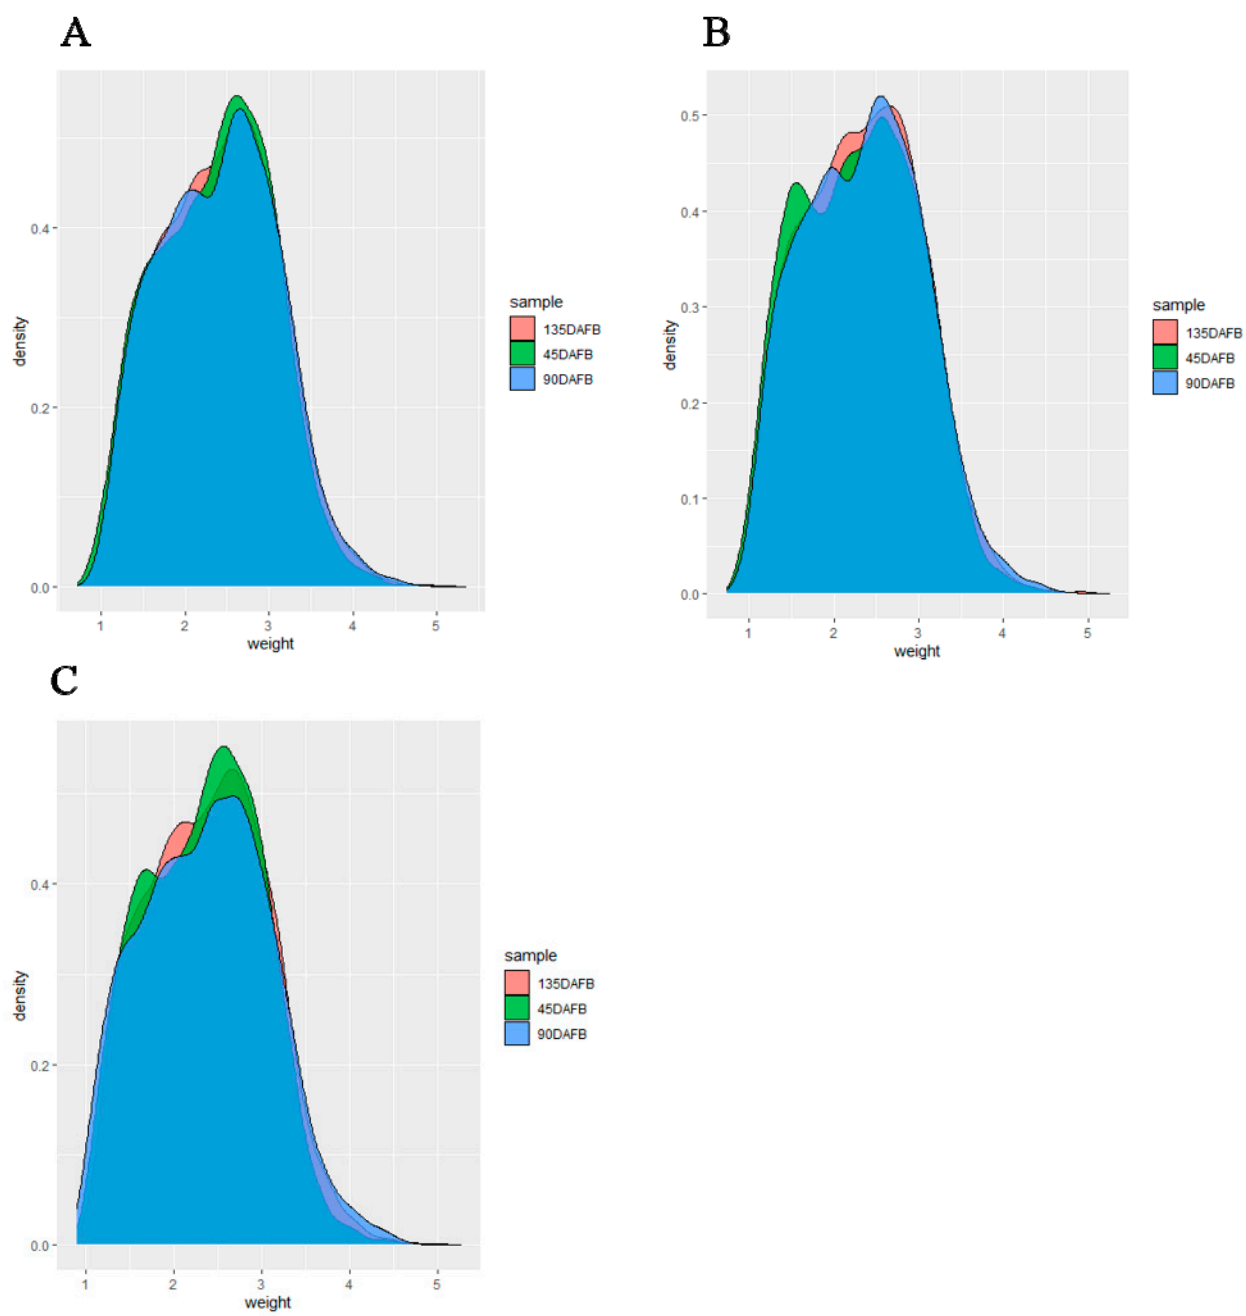

Figure S2. Kernel plot of the overall expression density. (A) YJ50 (B) YJ33 (C) YJ01. X axis represent  $\log_{10}(\text{FPKM})$ .

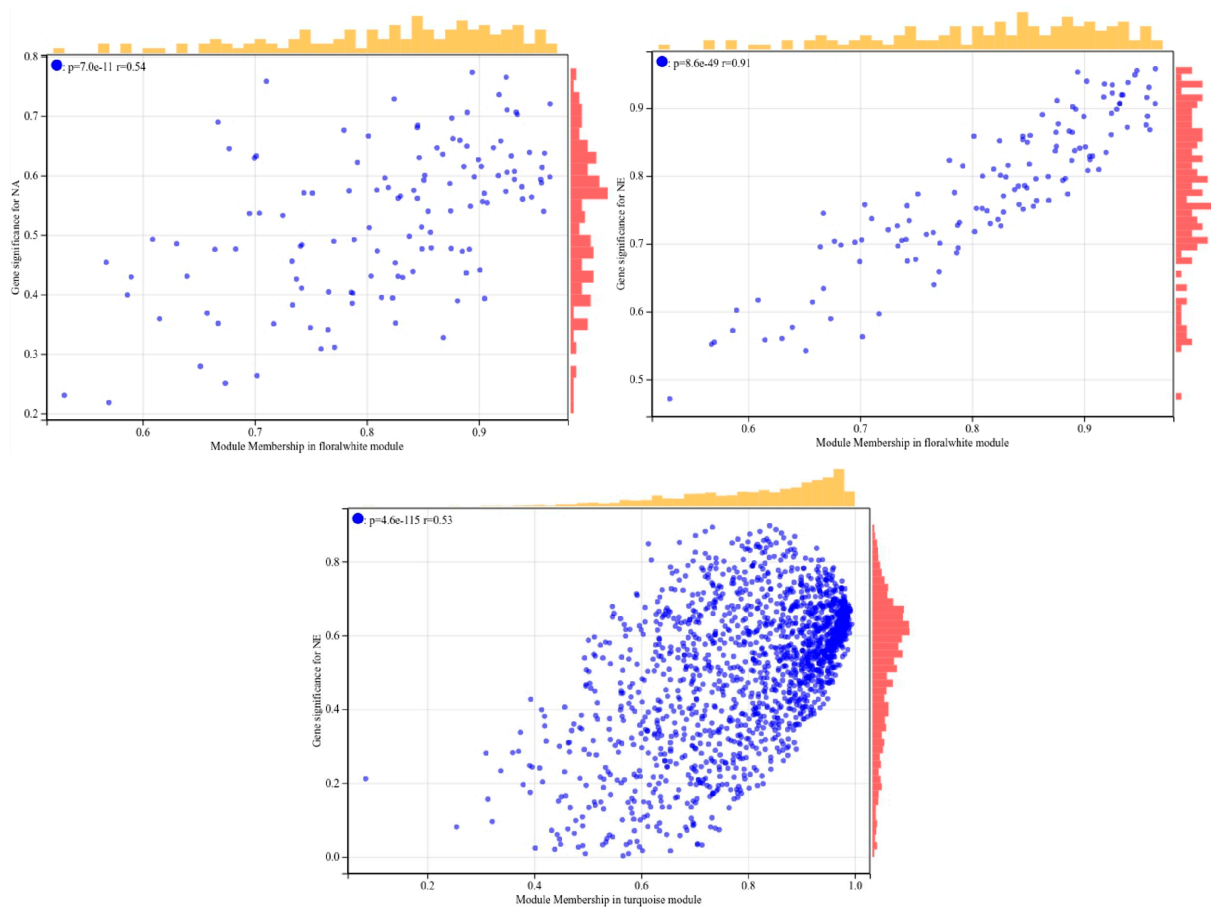

Figure S3. The correlations between modules and the gene expression profiles.
